# Supplementary material for: Rhodium doping augments photocatalytic activity of barium titanate: effect of electronic structure engineering
Source: Royal Society of Chemistry journal article supplement (doi:10.1039/d0na00702a), 2020-01-01
Supplement: d0na00702a1.pdf [file d0na00702a1.pdf]

## Supplementary Information

# Rhodium Doping Augments Photocatalytic Activity of Barium Titanate: Effect of Electronic Structure Engineering

D Krishna Bhat<sup>a\*</sup>, Harsha Bantawal<sup>a</sup> and U Sandhya Shenoy<sup>b\*</sup>

<sup>a</sup>Department of Chemistry, National Institute of Technology Karnataka, Surathkal, Mangalore-575025, India.

<sup>b</sup>Department of Chemistry, College of Engineering and Technology, Srinivas University, Mukka, Mangalore-574146, India.

\*Corresponding author E-mail address: [denthajekb@gmail.com](mailto:denthajekb@gmail.com); [sandhyashenoy347@gmail.com](mailto:sandhyashenoy347@gmail.com)

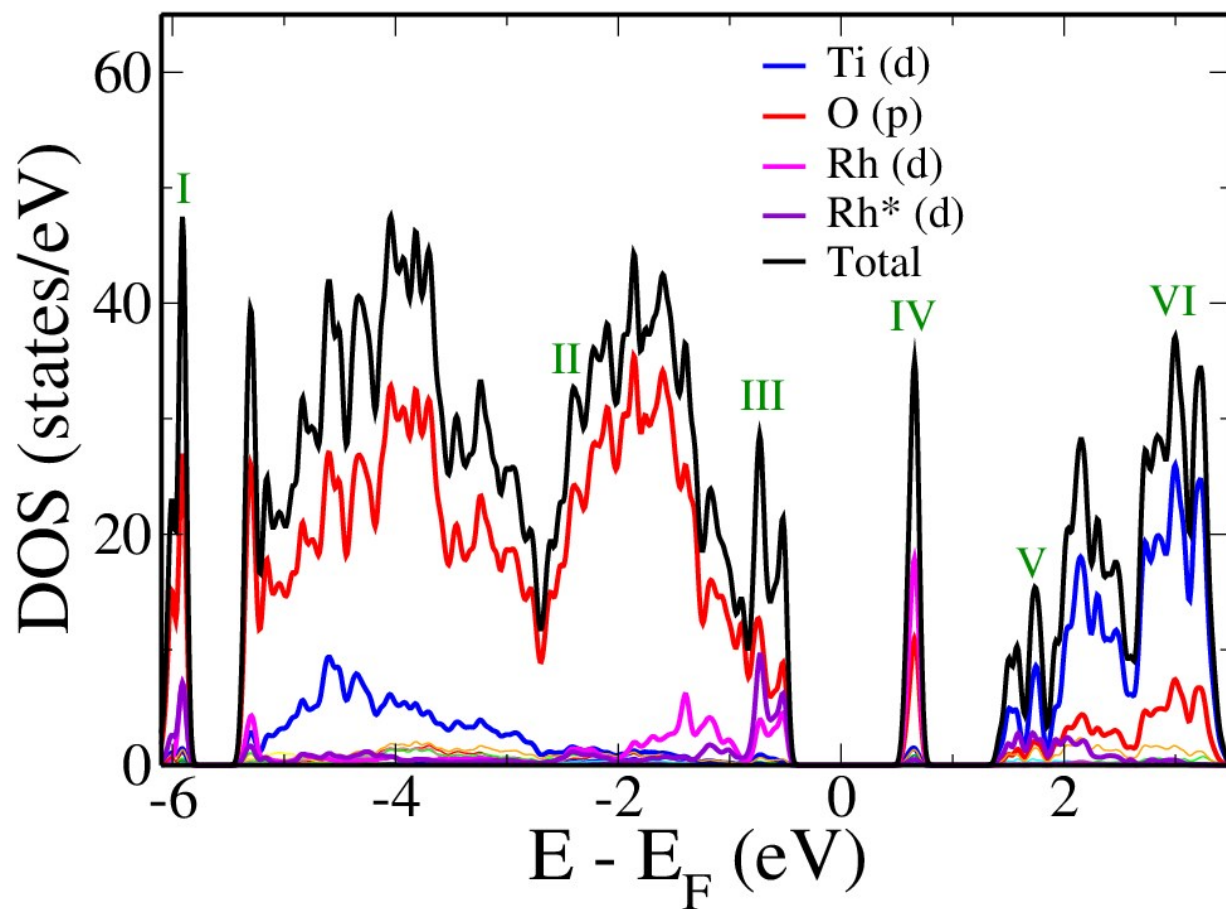

**Figure S1.** pdos of  $2 \times 2 \times 2$  supercell of *Rh* doped  $\text{BaTiO}_3$  (case A) with one *Rh* in *Ti* site (lavender) indicated as *Rh\** and another *Rh* in *Ba* site (pink).

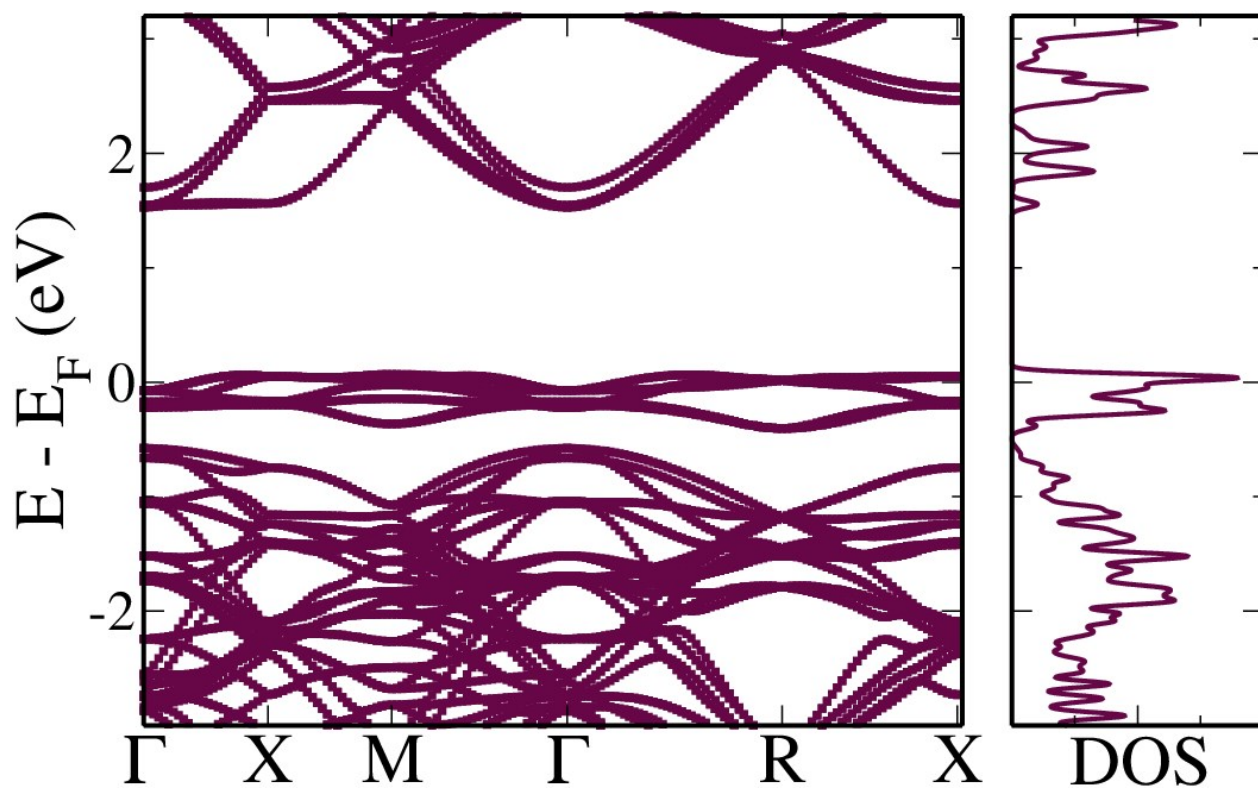

**Figure S2.** Electronic structure and DOS of  $2 \times 2 \times 2$  supercell of *Rh* doped  $\text{BaTiO}_3$  with two *Rh* in *Ba* sites.

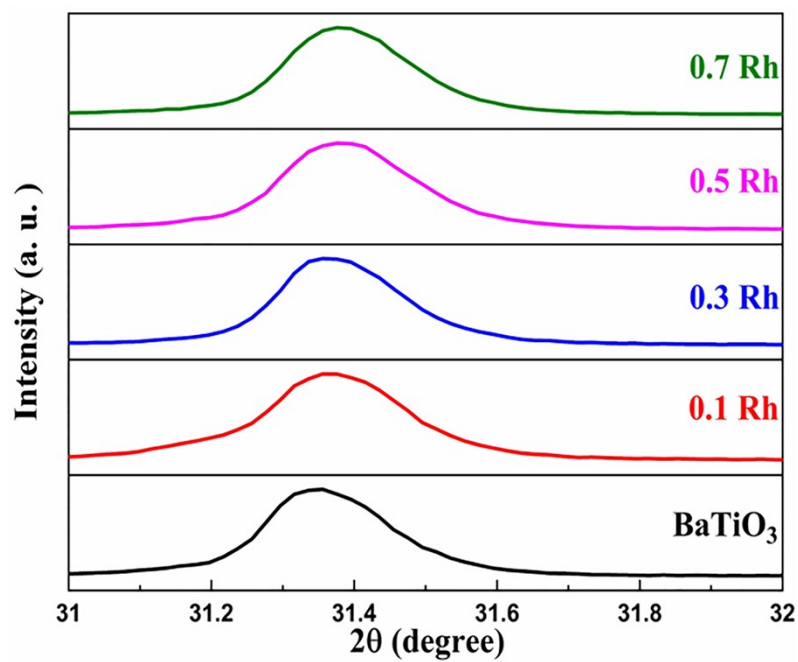

**Figure S3.** XRD patterns of synthesized samples showing (110) peak shift to higher  $\theta$  values.

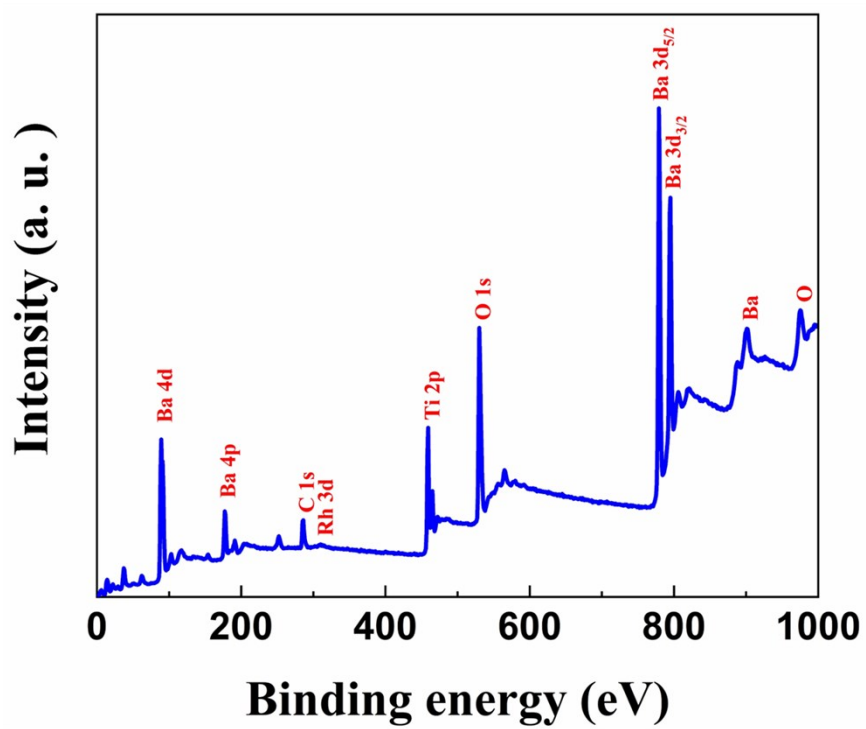

Figure S4. XPS survey spectrum of 0.5 Rh.

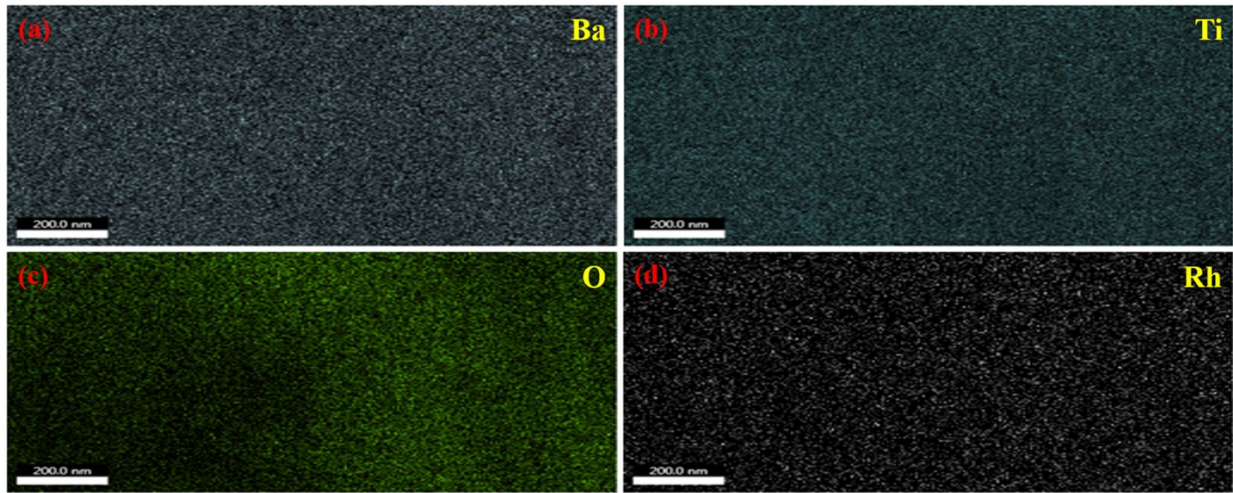

**Figure S5.** Spot EDX of a) *Ba*, b) *Ti*, c) *O* and d) *Rh* in 0.5 Rh.

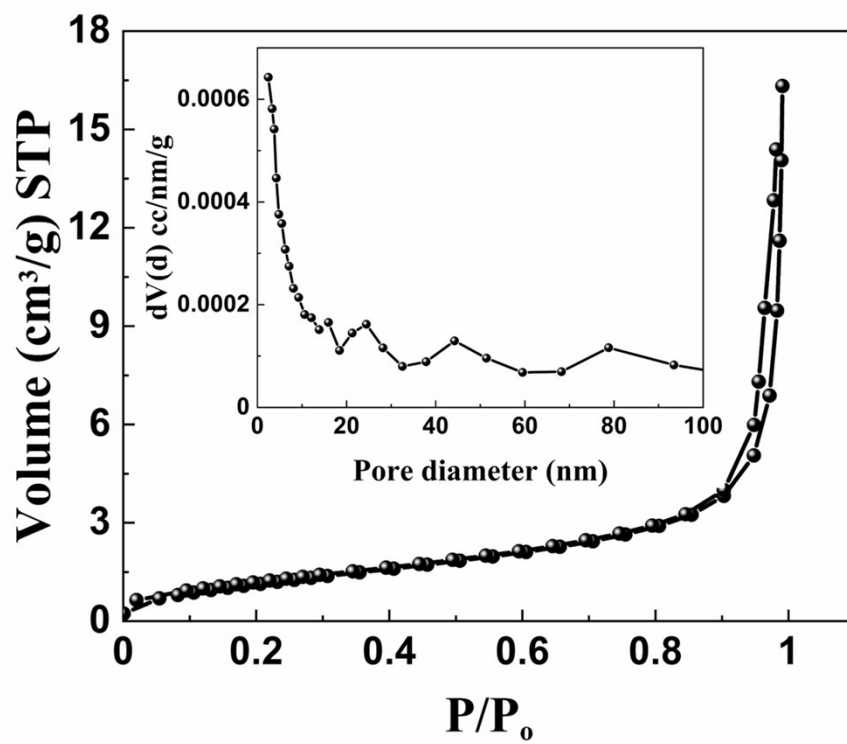

**Figure S6.** BET surface area analysis of BaTiO<sub>3</sub> (inset shows pore size distribution).

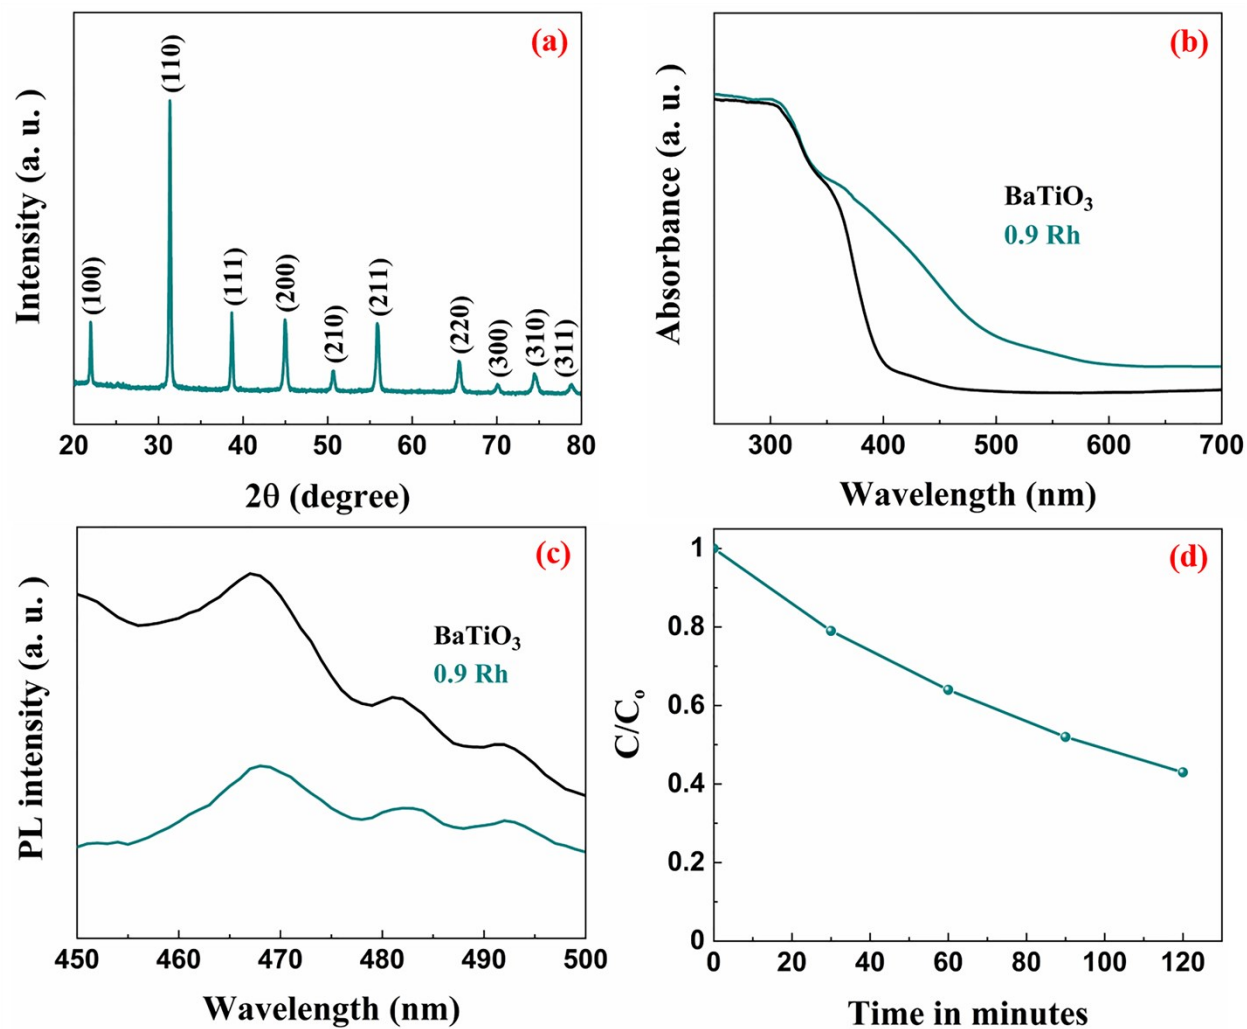

**Figure S7.** a) XRD of 0.9 Rh, b) UV and c) PL spectra of BaTiO<sub>3</sub> and 0.9 Rh and d) photocatalytic degradation of MB using 0.9 Rh.



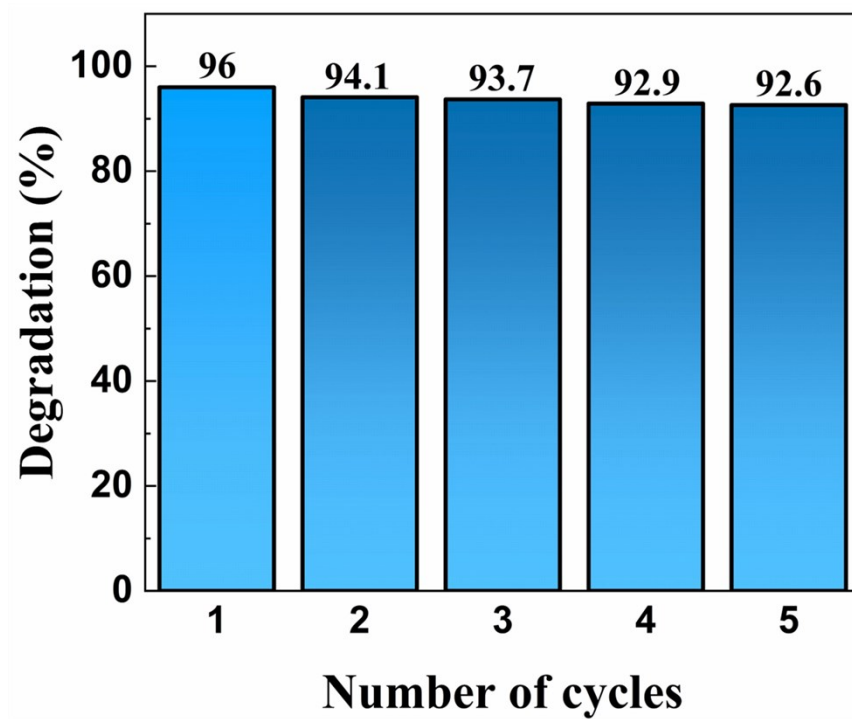

**Figure S8.** Cyclic stability test of 0.5 Rh.

**Table S1.** Comparison of photocatalytic activity of 0.5 Rh sample with reported literatures.

| <b>Photocatalysts</b>                                         | <b>Light source</b>                                                                         | <b>Pollutant used</b>                        | <b>Degradation extent and Time</b>                    | <b>Reference</b>              |
|---------------------------------------------------------------|---------------------------------------------------------------------------------------------|----------------------------------------------|-------------------------------------------------------|-------------------------------|
| Rh doped BaTiO <sub>3</sub>                                   | Visible light source (High pressure 250 W Hg vapor lamp)                                    | Methylene Blue                               | 96 %, 120 min                                         | Present work                  |
| N doped BaTiO <sub>3</sub>                                    | Visible light source (300 W Xe lamp, UV cutoff filter)                                      | Rhodamine B                                  | 50 %, 240 min                                         | Cao et al. 2014 [1]           |
| BaTiO <sub>3</sub> @g-C <sub>3</sub> N <sub>4</sub> composite | Solar simulator (200 W Xe lamp)                                                             | Methyl orange                                | 76 %, 360 min                                         | Xian et al. 2015 [2]          |
| BaTiO <sub>3</sub> @graphene nanocomposite                    | Visible light source (500 W Xe lamp, UV cutoff filter)                                      | Methylene blue                               | 69.5 %, 480 min                                       | Wang et al. 2015 [3]          |
| Mn doped BaTiO <sub>3</sub>                                   | Visible light source (300 W Tungsten lamp)                                                  | Methylene blue                               | 97.04 %, 360 min                                      | Nageri and Kumar 2018 [4]     |
| Au <sub>x</sub> /BaTiO <sub>3</sub> heterostructure           | All spectrum light source (300 W Xe lamp, cutoff filter)                                    | Methyl orange                                | 80 %, 75 min<br>97 %, 75 min                          | Xu et al. 2019 [5]            |
| W doped BaTiO <sub>3</sub>                                    | 18 UV lamps as UV light source and 2 metal halide lamps as visible light source             | Tetracycline                                 | UV-A light: 77 %<br>Visible light: 80 % in 180 min    | Demircivi and Simsek 2019 [6] |
| Fe-Cr co-doped BaTiO <sub>3</sub>                             | Solar simulator (Xe lamp)                                                                   | Methyl orange                                | 94 %, 90 min                                          | Amaechi et al. 2019 [7]       |
| Ce doped BaTiO <sub>3</sub>                                   | UV light source (254 nm) and visible light source (400–750 nm, 300 W tungsten-halogen lamp) | Methylene blue<br>Methyl violet<br>Congo red | 90.2 %, 120 min<br>82.4 %, 120 min<br>78.5 %, 120 min | Senthilkumar et al. 2019 [8]  |
| Cr <sup>3+</sup> doped BaTiO <sub>3</sub>                     | Solar simulator (150 W Xe lamp)                                                             | Methyl orange                                | 87 %, 90 min                                          | Amaechi et al. 2019 [9]       |
| Ag doped BaTiO <sub>3</sub> composite                         | UV-vis light source (300 W Xe lamp)                                                         | Rhodamine B                                  | 61 %, 75 min<br>83 %, 75 min                          | Xu et al. 2019 [10]           |
| BaTiO <sub>3</sub> @graphene oxide composite                  | UV-vis light source (Xe lamp)                                                               | Methylene blue                               | 95 %, 180 min                                         | Mengting et al. 2019 [11]     |
| Fe doped BaTiO <sub>3</sub>                                   | Solar simulator (150 W Xe lamp)                                                             | Methyl orange                                | 75 %, 90 min                                          | Amaechi et al. 2019 [12]      |
| BaTiO <sub>3</sub> @carbon                                    | 18 UV lamps as                                                                              | Tetracycline                                 | UV-A light: 96                                        | Demircivi et                  |

|                                                                                                 |                                                                    |                                 |                                     |                          |
|-------------------------------------------------------------------------------------------------|--------------------------------------------------------------------|---------------------------------|-------------------------------------|--------------------------|
| fiber catalyst                                                                                  | UV-A light source and 2 metal halide lamps as visible light source |                                 | %<br>Visible light: 92 % in 180 min | al. 2020 [13]            |
| N-Ni co-doped<br>(Na <sub>0.5</sub> Bi <sub>0.5</sub> )TiO <sub>3</sub> -<br>BaTiO <sub>3</sub> | 300 W Xe lamp<br>(PLS-<br>SXE300+/UV)                              | Rhodamine B<br>Dibenzothiophene | 92.4 %, 80 min<br>90.37 %, 150 min  | Xiao et al.<br>2020 [14] |

## References

1. Cao, J.; Ji, Y.; Tian, C.; Yi, Z. Synthesis and Enhancement of Visible Light Activities of Nitrogen-Doped BaTiO<sub>3</sub>. *J. Alloys Compd.* 2014, 615, 243-248.
2. Xian, T.; Yang, H.; Di, L. J.; Dai, J. F. Enhanced Photocatalytic Activity of BaTiO<sub>3</sub>@ g-C<sub>3</sub>N<sub>4</sub> for the Degradation of Methyl Orange under Simulated Sunlight Irradiation. *J. Alloys Compd.* 2015, 622, 1098-1104.
3. Wang, R. X.; Zhu, Q.; Wang, W. S.; Fan, C. M.; Xu, A.W. BaTiO<sub>3</sub>-Graphene Nanocomposites: Synthesis and Visible Light Photocatalytic Activity. *New J. Chem.* 2015, 39, 4407-4413.
4. Nageri, M.; Kumar, V. Manganese-Doped BaTiO<sub>3</sub> Nanotube Arrays for Enhanced Visible Light Photocatalytic Applications. *Mater. Chem. Phys.* 2018, 213, 400-405.
5. Xu, S.; Guo, L.; Sun, Q.; Wang, Z. L. Piezotronic Effect Enhanced Plasmonic Photocatalysis by AuNPs/BaTiO<sub>3</sub> Heterostructures. *Adv. Funct. Mater.* 2019, 29, 1808737.
6. Demircivi, P.; Simsek, E. B. Visible-Light-Enhanced Photoactivity of Perovskite-Type W-Doped BaTiO<sub>3</sub> Photocatalyst for Photodegradation of Tetracycline. *J. Alloys Compd.* 2019, 774, 795-802.
7. Amaechi, I. C.; Hadj Youssef, A.; Rawach, D.; Claverie, J. P.; Sun, S.; Ruediger, A. Ferroelectric Fe-Cr Codoped BaTiO<sub>3</sub> Nanoparticles for the Photocatalytic Oxidation of Azo Dyes. *ACS Appl. Nano Mater.* 2019, 2, 2890-2901.
8. Senthilkumar, P.; Jency, D. A.; Kavinkumar, T.; Dhayanithi, D.; Dhanuskodi, S.; Umadevi, M.; Manivannan, S.; Giridharan, N. V.; Thiagarajan, V.; Sriramkumar, M.; Jothivenkatachalam, K. Built-in Electric Field Assisted Photocatalytic Dye Degradation and Photoelectrochemical Water Splitting of Ferroelectric Ce Doped BaTiO<sub>3</sub> Nanoassemblies. *ACS Sustain. Chem. Eng.* 2019, 7, 12032-12043.
9. Amaechi, I. C.; Kolhatkar, G.; Youssef, A. H.; Rawach, D.; Sun, S.; Ruediger, A. B-Site Modified Photoferroic Cr<sup>3+</sup>-Doped Barium Titanate Nanoparticles: Microwave-Assisted Hydrothermal Synthesis, Photocatalytic and Electrochemical Properties. *RSC Adv.* 2019, 9, 20806-20817.
10. Xu, S.; Liu, Z.; Zhang, M.; Guo, L. Piezotronics Enhanced Photocatalytic Activities of Ag-BaTiO<sub>3</sub> Plasmonic Photocatalysts. *J. Alloys Compd.* 2019, 801, 483-488.

11. Mengting, Z.; Kurniawan, T. A.; Fei, S.; Ouyang, T.; Othman, M. H. D.; Rezakazemi, M.; Shirazian, S. Applicability of BaTiO<sub>3</sub>/Graphene Oxide (GO) Composite for Enhanced Photodegradation of Methylene Blue (MB) in Synthetic Wastewater under UV–Vis Irradiation. *Environ. Pollut.* 2019, 255, 113182.
12. Amaechi, I. C.; Youssef, A. H.; Kolhatkar, G.; Rawach, D.; Gomez-Yañez, C.; Claverie, J. P.; Sun, S.; Ruediger, A. Ultrafast Microwave-Assisted Hydrothermal Synthesis and Photocatalytic Behaviour of Ferroelectric Fe<sup>3+</sup>-Doped BaTiO<sub>3</sub> Nanoparticles under Simulated Sunlight. *Catal. Today* 2019, DOI: <https://doi.org/10.1016/j.cattod.2019.07.021>.
13. Demircivi, P.; Gulen, B.; Simsek, E. B.; Berek, D. Enhanced Photocatalytic Degradation of Tetracycline using Hydrothermally Synthesized Carbon Fiber Decorated BaTiO<sub>3</sub>. *Mater. Chem. Phys.* 2020, 241, 122236.
14. Xiao, H.; Luo, C.; Huangfu, G.; Guo, Y. Boosting the Photocatalytic Ability of Bandgap Engineered (Na<sub>0.5</sub>Bi<sub>0.5</sub>)TiO<sub>3</sub>-BaTiO<sub>3</sub> by N-Ni Co-doping. *J. Phys. Chem. C* 2020, 124, 11810-11818.
